# Supplementary material for: Vitamin D Status Does Not Affect Disability Progression of Patients with Multiple Sclerosis over Three Year Follow-Up
Source: PubMed Central journal article supplement (PMC4898831; doi:10.1371/journal.pone.0156122), 2016-06-08
Supplement: pone.0156122.s002.pdf [file pone.0156122.s002.pdf]

Mrs. Anne-Hilde Muris  
School for Mental Health and Neuroscience  
Maastricht Universitair Medisch Centrum  
Universiteitssingel 40, kamer C2.558  
Postbus 616  
6200 MD Maastricht

Date February, 15, 2016

CEC number 16-N-45

Title 'Vitamin D Status Does Not Affect Disability Progression of Patients with Multiple Sclerosis over Three Year Follow-up'

The committee assessed the following documents received 14<sup>th</sup> of February 2016:

- Your letter from February, 14, 2016
- Protocol titled 'Vitamin D and disability progression in MS patients'
- CV A. Muris, February, 2016

Referring to your study it is hereby confirmed that the Medical Research Involving Human Subjects Act (WMO) does not apply to the above mentioned study and that therefore an official approval of this study by METC Z is not required under the WMO. Assuming the researchers work in respect with the Code of Good Conduct as well as the WBP (data protection act) we do not have any concerns against this study.

At the end of the study, the committee will receive a report and/or an article.

Kind regards,  
On behalf of METC Z,  
Dr. J.W. Greve  
President

Mrs. mr. H. van den Besselaar, Secretary

copy: Zuyderland Board  
a.muris@maastrichtuniversity.nl

Correspondentieadres  
METC Z  
Secretariaat  
Postbus 5500  
6130 MB Sittard

metc@atriummc.nl

Bezoekadressen  
Leerhuis Gebouw V  
Heerlen (ma-di-wo-do)  
H. Dunantstraat 5  
T 045 – 5767 194

Leerhuis BWO K&E A  
Sittard-Geleen (wo)  
Dr. van der Hoffplein 1  
T 088 - 459 7347

[www.atriummc.nl/METC](http://www.atriummc.nl/METC)

METC Z leden:  
dr. J.W. Greve (voorzitter)  
dr. J. Kragten (vicevoorzitter)  
mw. drs. L. Dielis  
mw. mr. dr. R. ten Hoopen  
dr. R. Janknegt  
ir. drs. A. Kessels  
dr. H. van der Kuy  
mw. dr. A. Moser  
mw. dr. B. Panis  
dr. M. Reinders  
drs. H. Rijkse  
dr. S. Samijo  
drs. B. Simons  
drs. J. van der Snoek  
mw. mr. L. Teeuwen  
dr. A. Voogd

vaste adviseurs:  
dr. W. van Asten  
mw. dr. A. van den Hout

METC Z secretariaat:  
mw. mr. H. van den Besselaar  
mw. J. Jennekens  
mw. G. Spreeuwenberg  
mw. B. Westerkamp
